# Supplementary material for: Perception of Affordance during Short-Term Exposure to Weightlessness in Parabolic Flight
Source: PLoS One. 2016 Apr 20;11(4):e0153598. doi: 10.1371/journal.pone.0153598 (PMC4838214; doi:10.1371/journal.pone.0153598)
Supplement: S1 File — Data used for statistics and figures. (XLS) [file pone.0153598.s001.xls]

## Sheet: Fig6
Figure 6
A/S ratio	1G_130	1G_155	0G_130	0G_155
1	1.287	1.462	1.095	1.243
2	1.629	1.716	1.532	1.655
3	1.372	1.429	1.383	1.47
4	1.189	1.32	1.409	1.454
5	0.938	1.113	1.066	1.235
6	1.297	1.414	1.288	1.226
7	1.583	1.677	1.333	1.479
8	1.016	1.104	1.071	1.205
9	1.816	1.641	1.65	1.489
10	1.68	1.823	1.485	1.462
11	1.112	1.275	1.216	1.239
12	1.77	1.81	1.641	1.667
13	1.631	1.64	1.308	1.611

## Sheet: Fig7A
Figure 7B
Subjective eye-level° ( relative to the center of the screen)	G1_neutral	G1_130	G1_155	G0_neutral	G0_130	G0_155
1	-2.617	0.367	0.7	-3.25	0.117	-0.15
2	-3.383	7.367	3.85	-2.783	3.933	2.617
3	-0.117	1.683	1.75	0.067	0.983	0.8
4	5.783	8.633	8.057	0.783	8.867	9.083
5	-1.317	-3.117	-4.617	2.5	-3.917	-4.95
6	-2.55	-0.983	-2.75	-4.167	-2.617	-4.317
7	4.933	6.467	5.533	4.533	5.95	5.75
8	-0.267	-0.1	-0.35	-0.35	0.65	-0.083
9	0.817	6.85	5.75	0.517	5.967	4.683
10	-2.983	5.3	3.733	-0.15	3.15	1.867
11	2.317	7.35	6.45	0.15	2.883	2.3
12	-0.733	4.1	3.75	-0.85	4.1	3.3
13	0.55	3.85	2.617	-1.8	0.283	-1.117

## Sheet: Fig7B
Figure 7B
sVEH° (relative to the visual floor)	1G_130	1G_155	0G_130	0G_155
1	10.887	13.185	10.637	12.335
2	17.887	16.335	14.454	15.102
3	12.204	14.235	11.504	13.285
4	19.154	20.542	19.387	21.569
5	7.404	7.869	6.604	7.535
6	9.537	9.735	7.904	8.169
7	16.987	18.019	16.471	18.235
8	10.421	12.135	11.171	12.402
9	17.371	18.235	16.487	17.169
10	15.821	16.219	13.671	14.352
11	17.871	18.935	13.404	14.785
12	14.621	16.235	14.621	15.785
13	14.371	15.102	10.804	11.369

## Sheet: Fig8
Figure 8
A°/sVEH°	1G_130	1G_155	0G_130	0G_155
1	0.444	0.416	0.387	0.378
2	0.334	0.385	0.389	0.402
3	0.431	0.385	0.461	0.424
4	0.268	0.278	0.314	0.291
5	0.435	0.485	0.554	0.562
6	0.522	0.557	0.625	0.576
7	0.35	0.349	0.304	0.304
8	0.335	0.312	0.329	0.334
9	0.4	0.345	0.384	0.332
10	0.407	0.43	0.416	0.391
11	0.239	0.258	0.348	0.322
12	0.483	0.445	0.448	0.422
13	0.407	0.39	0.435	0.509
